# Supplementary material for: Comprehensive Analysis of Chromatin Accessibility and Transcriptional Landscape Identified BRCA1 Repression as a Potential Pathological Factor for Keloid
Source: MDPI journal article supplement (doi:10.3390/polym14163391), 2022-08-19
Supplement: s1 [file s1]

**Figure S1** Fragment length distribution of ATAC-seq of keloid **(A)** and normal **(B)** DF sample.

**Figure S2** Significantly enriched KEGG pathways of looser **(A)** and tighter **(B)** chromatin regions in keloid DF samples compared with that of normal samples.

**Figure S3** Circle plot of significantly enriched KEGG pathways **(A)** and GO terms **(B)** of DEGs in keloid DF samples compared with that of normal samples. Dots represent genes and different color represents the down- or up-regulation.

**Figure S4** GSEA plot of significantly enriched KEGG pathways in shBRCA1 DF samples.

**Figure S5** IGV visualization of ChIP-seq signal of BRCA1, H3K4me1, H3K27ac as well as ATAC-seq signal on TP63, a conventional target of BRCA1. Both the H3K4me1 and H3K27ac ChIP-seq are in keloid DF samples. H, Health; K, Keloid.
